# Supplementary material for: Phosphate ion and oxygen defect-modulated nickel cobaltite nanowires: a bifunctional cathode for flexible hybrid supercapacitors and microbial fuel cells
Source: Royal Society of Chemistry journal article supplement (doi:10.1039/d0ta01423k), 2020-01-01
Supplement: d0ta01423k1.pdf [file d0ta01423k1.pdf]

## Supporting Information

### Phosphate Ions and Oxygen Defects Modulated Nickel Cobaltite Nanowires: A Bifunctional Cathode for Flexible Hybrid Supercapacitors and Microbial Fuel Cells

Wenda Qiu,<sup>‡\*ab</sup> Quanhua Zhou,<sup>‡a</sup> Hongbing Xiao,<sup>a</sup> Chun Zhou,<sup>a</sup> Wenting He,<sup>a</sup> Yu Li,<sup>\*a</sup> and Xihong Lu<sup>b</sup>

<sup>a</sup> School of Eco-Environmental Technology, Guangdong Industry Polytechnic, 152 Xingang West Road, Guangzhou 510300, China.

<sup>b</sup> MOE of the Key Laboratory of Bioinorganic and Synthetic Chemistry, KLGHEI of Environment and Energy Chemistry, School of Chemistry, Sun Yat-Sen University, 135 Xingang West Road, Guangzhou 510275, China.

\*Corresponding Author. E-mail: qiuwd5@mail.sysu.edu.cn (W. Qiu);  
liyugq@hotmail.com (Yu Li)

### Calculations:

The specific or areal capacity can be calculated via the equation (1) and (2) as follows:

CV curves:

$$C_s = \frac{Q}{m} = \frac{S}{2vm} \quad (1)$$

GCD curves:

$$C_s = \frac{Q}{m} = \frac{I\Delta t}{m} \quad (2)$$

Where  $C_s$  (mAh g<sup>-1</sup>) is the specific capacity;  $Q$  (C) is the average charge during the charging and discharging process;  $m$  (g) is the mass loading of the active materials;  $S$

(A V) is the integrated area of the CV curve;  $v$  (V/s) is the scan rate;  $I$  (A) is the constant discharging current;  $\Delta t$  (s) is the discharging time.

Energy density and power density were calculated by using the following equation (3) and (4):

$$E = \int_0^{\Delta t} IV(t)dt/m \quad (3)$$

$$P = \frac{E}{1000 \times \Delta t} \quad (4)$$

Where  $E$  (Wh kg<sup>-1</sup>) is the energy density,  $P$  is the power density (kW kg<sup>-1</sup>),  $V$  (V) is the potential window,  $I$  (mA) is the discharging current,  $m$  (g) is the total mass of active materials of the device, and  $\Delta t$  (h) is the discharging time.

### **Balance the charge of electrodes in HSCs device:**

As for a SC, the charge balance will follow the relationship  $q^+ = q^-$ . The charge stored by each electrode depends on the capacity ( $C_s$ ), the potential range for the charge/discharge process ( $\Delta E$ ) and the area of the electrode ( $A$ ) following the Equation 10:

$$q = C_s \times \Delta E \times A \quad (10)$$

To obtain  $q^+ = q^-$  at 100 mV s<sup>-1</sup>, the area balancing between PNC<sub>x</sub> and 3DPG will be calculated as follow:

$$\frac{A_{PNCx}}{A_{3DPG}} = \frac{C_{(3DPG)} \times \Delta E_{3DPG}}{C_{PNCx} \times \Delta E_{PNCx}} \approx \frac{1}{1.12}$$

Therefore, the calculated areal ration between the PNC<sub>x</sub> electrode and 3DPG electrode was about 1:1.12.

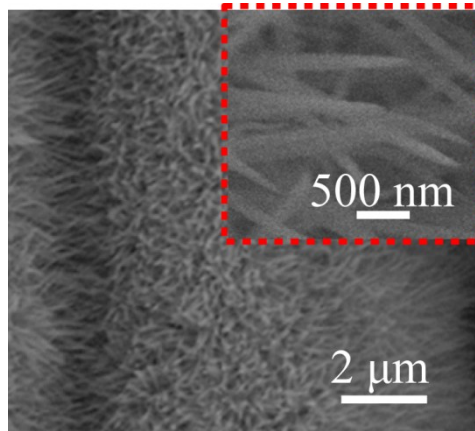

**Figure S1.** SEM images of the as-prepared NCO NWs.

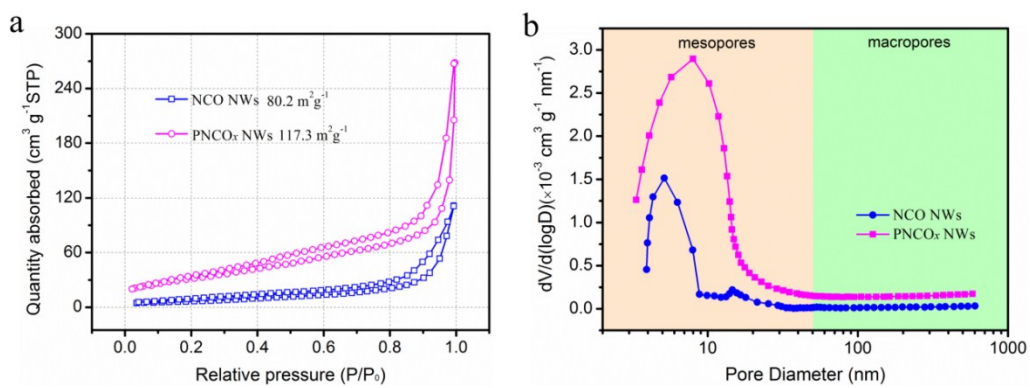

**Figure S2.** (a)  $\text{N}_2$  adsorption/desorption isotherms and (b) pore-size distribution of the NCO NWs and  $\text{PNCOf}_x$  NWs.

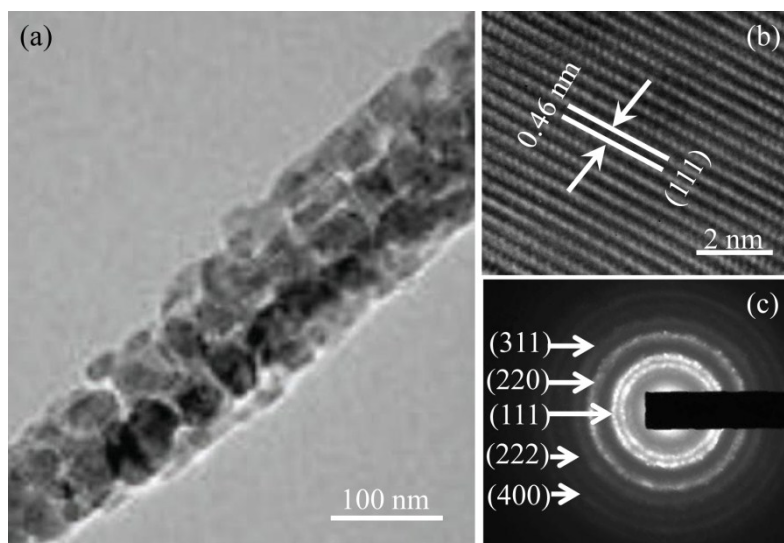

**Figure S3.** (a) TEM, (b) HRTEM, and (c) the corresponding SAED pattern of the pristine NCO NWs.

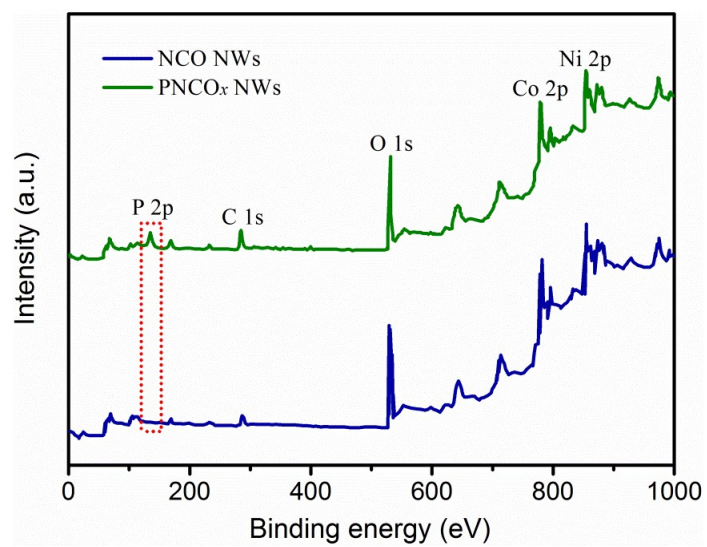

**Figure S4.** XPS survey spectra of NCO and  $\text{PNCO}_x$  NWs.

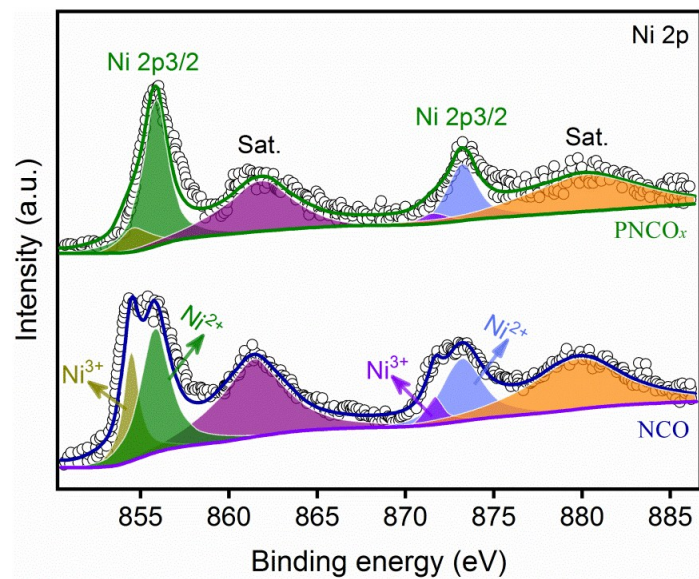

**Figure S5.** XPS survey of Ni 2p spectra for the pristine NCO and PNCO<sub>x</sub> NWs.

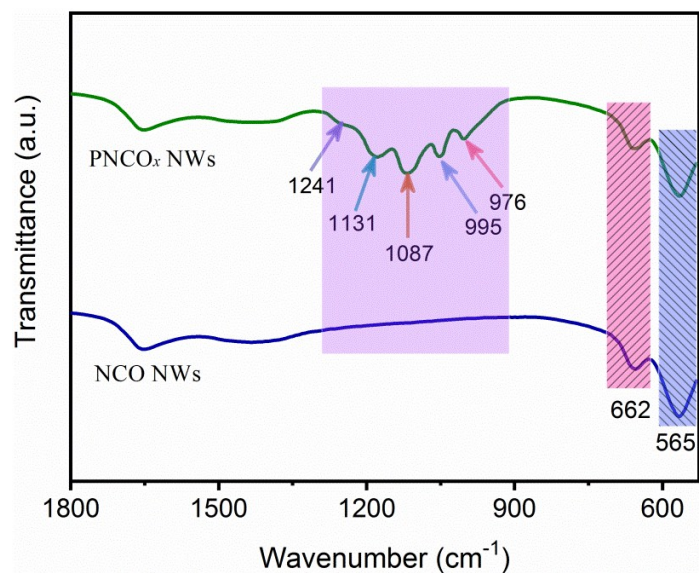

**Figure S6.** FTIR spectra of pristine NCO and PNCO<sub>x</sub> NWs.

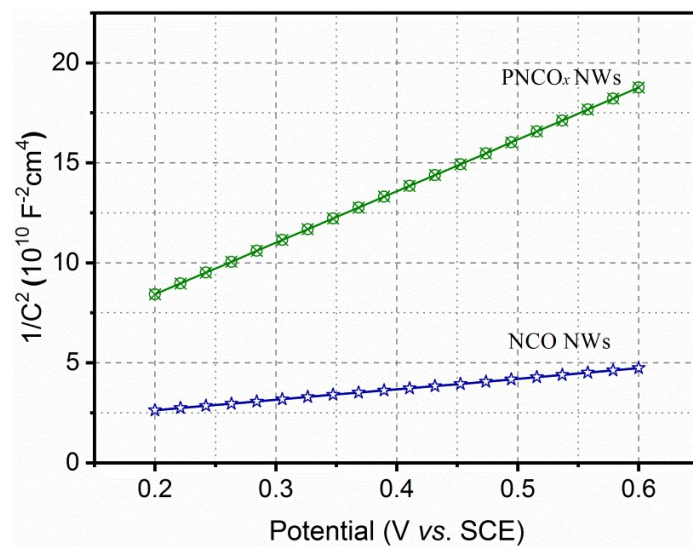

**Figure S7.** Mott-Schottky plots of pristine NCO and  $\text{PNCO}_x$  NWs.

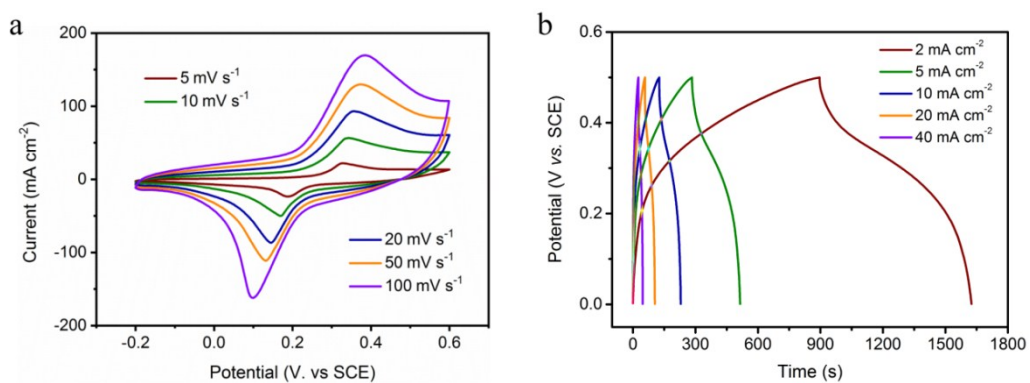

**Figure S8.** (a) CV curves of the  $\text{PNCO}_x$  electrode collected at various scan rates. (b) GCD curves of the  $\text{PNCO}_x$  electrode collected at different current density.

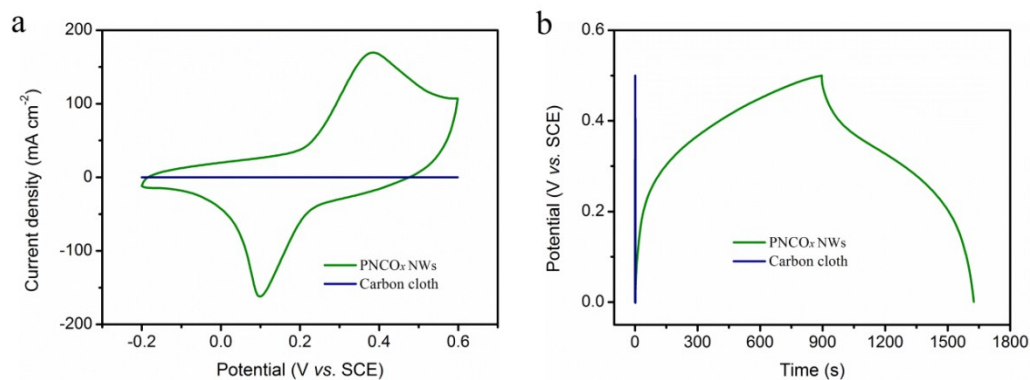

**Figure S9.** (a) CV and (b) GCD curves of the carbon cloth and  $\text{PNCO}_x$  NWAs electrodes collected at  $100 \text{ mV s}^{-1}$  and  $2 \text{ mA cm}^{-1}$ , respectively.

**Table S1.** Electrochemical performance obtained from NCO based electrodes.

| Type of electrode             | capacity ( $\text{mAh g}^{-1}$ )  | Rate capability                              | Cyclability<br>(cycles) | Ref.      |
|-------------------------------|-----------------------------------|----------------------------------------------|-------------------------|-----------|
| $\text{PNCO}_x$ NWAs          | 686 ( $2 \text{ mA cm}^{-1}$ )    | 58% (2 to $40 \text{ mA cm}^{-2}$ )          | 96.5% (20000)           | This work |
| NCO nanoneedle arrays         | 393 ( $1.11 \text{ mA cm}^{-2}$ ) | 18.91% (1.11 to $22.24 \text{ mA cm}^{-2}$ ) | 89.32% (2000)           | 1         |
| Mesoporous NCO nanosheets     | 366 ( $1.8 \text{ mA cm}^{-2}$ )  | 39% (1.8 to $48.6 \text{ mA cm}^{-2}$ )      | 93% (3000)              | 2         |
| $\text{NCO@NiCo}_2\text{S}_4$ | 260 ( $2 \text{ mA cm}^{-1}$ )    | 70.5% (2 to $20 \text{ mA cm}^{-2}$ )        | 65% (4000)              | 4         |
| NCO/MCMF                      | 257 ( $2 \text{ mA cm}^{-2}$ )    | 72.68% (2 to $40 \text{ mA cm}^{-2}$ )       | 85.8% (10000)           | 5         |
| CC@NCO                        | 176 ( $2.5 \text{ mA cm}^{-1}$ )  | 45.8% (2.5 to $60 \text{ mA cm}^{-2}$ )      | No data                 | 8         |

---

|                                      |                                 |                                            |                      |    |
|--------------------------------------|---------------------------------|--------------------------------------------|----------------------|----|
| NCO nanosheets                       | 168 (1.6 mA cm <sup>-2</sup> )  | 72.14% (1.6 to 16 mA cm <sup>-2</sup> )    | No data              | 3  |
| NCO-rGO                              | 153 (1.25 mA cm <sup>-2</sup> ) | 62.84% (1.25 to 100 mA cm <sup>-2</sup> )  | 91.6% (3000)         | 7  |
| NCO@NiCo <sub>2</sub> O <sub>4</sub> | 143 (2 mA cm <sup>-2</sup> )    | 74.84% (2 to 40 mA cm <sup>-2</sup> )      | 96% (4000)           | 14 |
| NCO-rGO                              | 133 (2 mA cm <sup>-1</sup> )    | 69% (2 to 20 mA cm <sup>-2</sup> )         | 90% (5000)           | 11 |
| NCO microspheres                     | 131 (2.8 mA cm <sup>-2</sup> )  | 73% (2.8 to 56 mA cm <sup>-2</sup> )       | 93.6% (1600)         | 9  |
| NCO/carbon textiles                  | 120 (1.2 mA cm <sup>-1</sup> )  | 79% (1.2 to 24 mA cm <sup>-2</sup> )       | No negligible (5000) | 6  |
| NCO-RGO                              | 116 (2 mA cm <sup>-2</sup> )    | 73.65% (2 to 40 mA cm <sup>-2</sup> )      | No negligible (4000) | 13 |
| Ni@NCO                               | 113 (1.54 mA cm <sup>-2</sup> ) | 67.85% (1.54 to 30.8 mA cm <sup>-2</sup> ) | 93.2% (6000)         | 10 |
| CC/NCO-S@NiO                         | 105 (2 mA cm <sup>-1</sup> )    | 91.2% (2 to 16 mA cm <sup>-2</sup> )       | 100% (10000)         | 15 |
| NCO nanospheres                      | 94 (4 mA cm <sup>-2</sup> )     | 80% (4 to 40 mA cm <sup>-2</sup> )         | No negligible (5000) | 12 |
| NCO                                  | 82 (1 mA cm <sup>-1</sup> )     | 80.55% (1 to 10 mA cm <sup>-2</sup> )      | 98.4% (1000)         | 16 |
| NCO NWA                              | 79 (0.5 mA cm <sup>-1</sup> )   | 47.09% (0.5 to 50 mA cm <sup>-2</sup> )    | No data              | 17 |

---



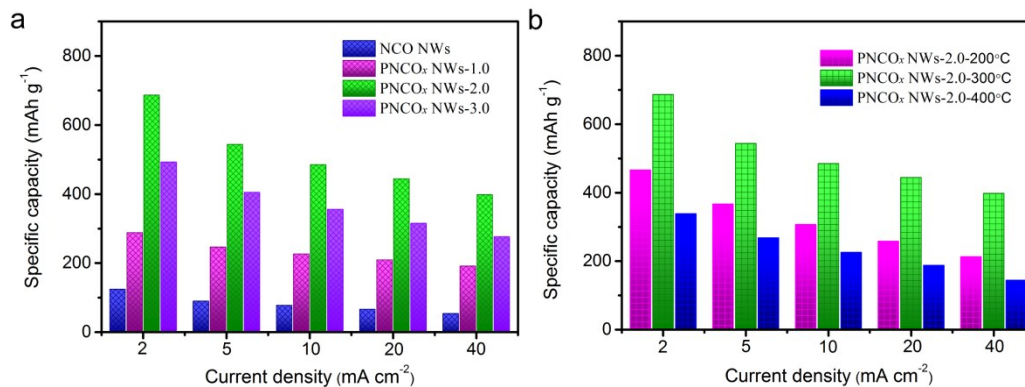

**Figure S10.** Specific capacity of PNCO<sub>x</sub> electrodes as a function of current densities with (a) different amount of NaH<sub>2</sub>PO<sub>2</sub>·H<sub>2</sub>O and (b) different annealing temperature.

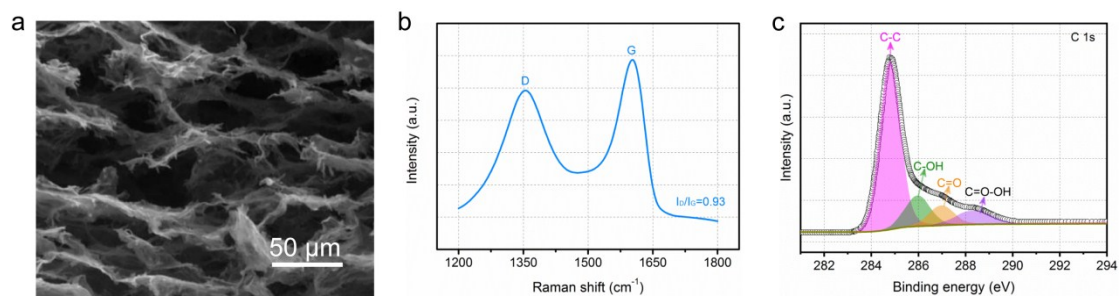

**Figure S11.** (a) SEM image, (b) Raman spectrum, and (c) C 1s core-level XPS spectrum of 3DPG sample.

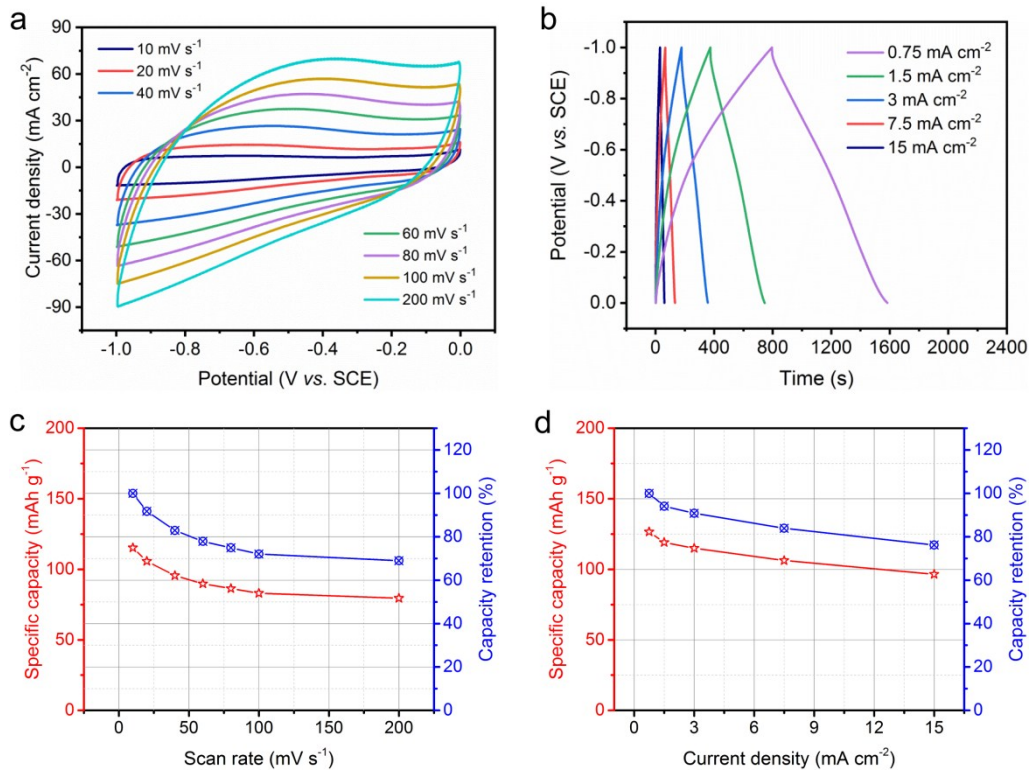

**Figure S12.** (a) CV curves for 3DPG electrode collected at different scan rates. (b) GCD curves of 3DPG electrode at various current densities. Specific capacity and capacity retention of 3DPG electrode as a function of (c) scan rate and (d) current density.

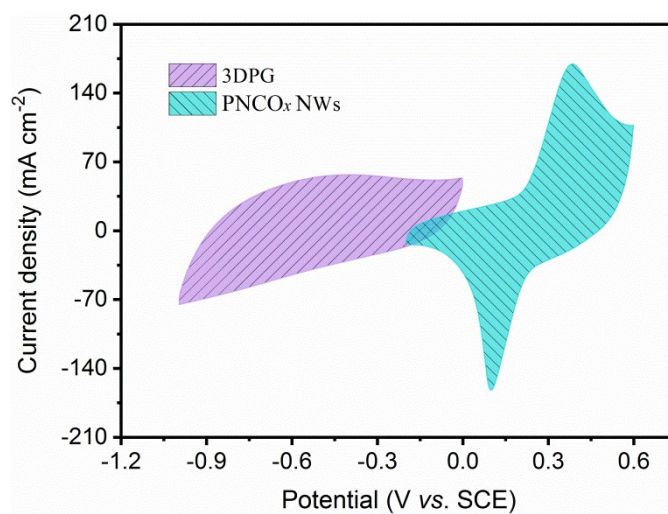

**Figure S13.** CV curves collected for 3DPG and PNCO<sub>x</sub> NWs at the scan rate of 100 mV s<sup>-1</sup>.

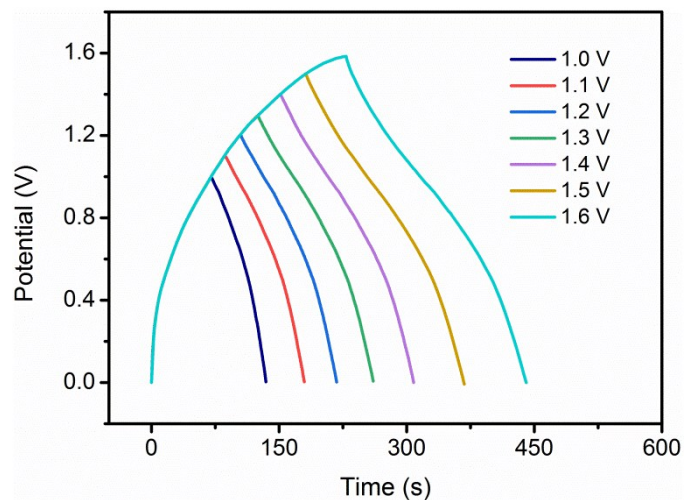

**Figure S14.** GCD curves of  $\text{PNCO}_x$  NWAs//3DPG HSCs device collected at  $5 \text{ mA cm}^{-2}$  in the corresponding potential windows.

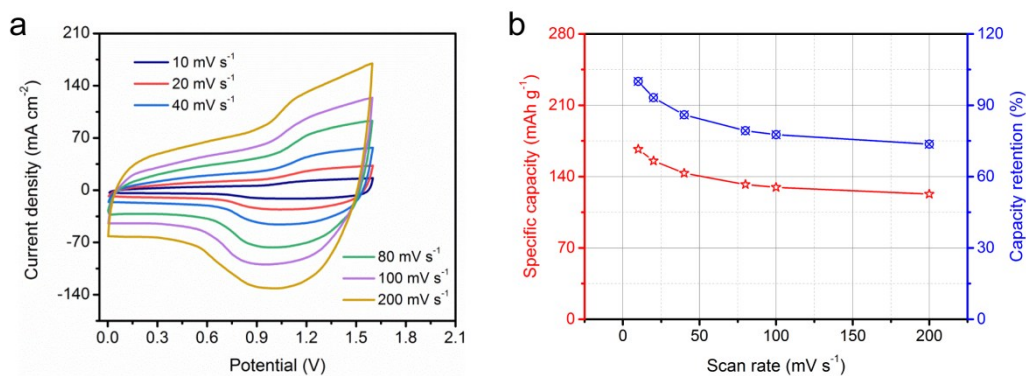

**Figure S15.** (a) CV curves for  $\text{PNCO}_x$  NWAs//3DPG HSCs device collected at different scan rates. (b) Specific capacity and capacity retention of  $\text{PNCO}_x$  NWAs//3DPG HSCs device as a function of scan rate.

**Table S2.** A comparison on the ORR activities of the recently reported catalysts.

| catalysts                                                       | ORR $E_{\text{onset}}$ (V vs. RHE) | ORR $E_{1/2}$ (V vs. RHE) | Electrolyte | Ref.      |
|-----------------------------------------------------------------|------------------------------------|---------------------------|-------------|-----------|
| PNC <sub>x</sub> NWAs                                           | 0.95                               | 0.83                      | 0.1 M KOH   | This work |
| NC/Co-NGC DSNCs                                                 | 0.92                               | 0.82                      | 0.1 M KOH   | 22        |
| N, S-carbon nanosheet                                           | 0.92                               | 0.77                      | 0.1 M KOH   | 23        |
| NCO/rGO                                                         | 0.91                               | 0.79                      | 0.1 M KOH   | 18        |
| CoO/N-graphene                                                  | 0.90                               | 0.81                      | 0.1 M KOH   | 25        |
| NCO NCs                                                         | 0.86                               | 0.674                     | 0.1 M KOH   | 19        |
| Co <sub>3</sub> O <sub>4</sub> /N-graphene                      | 0.86                               | 0.83                      | 0.1 M KOH   | 26        |
| Mn <sub>x</sub> O <sub>y</sub> /N-carbon                        | 0.85                               | 0.81                      | 0.1 M KOH   | 24        |
| MnCo <sub>2</sub> O <sub>4</sub> /NCNT                          | 0.85                               | 0.63                      | 0.1 M KOH   | 27        |
| Urchin like NCO                                                 | 0.83                               | 0.64                      | 0.1 M KOH   | 21        |
| Sphere like NCO                                                 | 0.81                               | 0.66                      | 1 M NaOH    | 20        |
| Ti <sub>3</sub> C <sub>2</sub> /g-C <sub>3</sub> N <sub>4</sub> | 0.72                               | 0.51                      | 0.1 M KOH   | 28        |

## References

1. G.Q. Zhang, H.B. Wu, H.E. Hoster, M.B. Chan-Park, X.W. Lou, *Energy Environ. Sci.*, 2012, **5**, 9453.
2. G.Q. Zhang, X.W. Lou, *Adv. Mater.*, 2013, **25**, 976.
3. H. Rong, T. Chen, R. Shi, Y.Y. Zhang, Z.H. Wang, *ACS Omega*, 2018, **3**, 5634.
4. Z.C. Qu, M.J. Shi, H.Z. Wu, Y.C. Liu, J.T. Jiang, C. Yan, *J. Power Sources*, 2019, **410**, 179.
5. C. Guan, X.M. Liu, W.N. Ren, X. Li, C.W. Cheng, J. Wang, *Adv. Energy Mater.*, 2017, **7**, 1602391.
6. C.Z. Yuan, J.Y. Li, L.R. Hou, X.G. Zhang, L.F. Shen, X.W. Lou, *Adv. Funct. Mater.*, 2012, **22**, 4592.
7. X. Wang, W.S. Liu, X.H. Lu, P.S. Lee, *J. Mater. Chem.* 2012, **22**, 23114.
8. X.Y. Liu, S.J. Shi, Q.Q. Xiong, L. Li, Y.J. Zhang, H. Tang, C.D. Gu, X.L. Wang, J.P. Tu, *ACS Appl. Mater. Interfaces*, 2013, **5**, 8790.
9. E. Umeshbabu, G. Rajeshkhanna, P. Justinb. G.R. Rao, *RSC Adv.*, 2015, **5**, 66657.
10. Y. Lei, Y.Y. Wang, W. Yang, H.Y. Yuan, D. Xiao, *RSC Adv.*, 2015, **5**, 7575.
11. L.F. Shen, Q. Che, H.S. Li, X.G. Zhang, *Adv. Funct. Mater.*, 2014, **24**, 2630.
12. H.W. Wang, Z.A. Hu, Y.Q. Chang, Y.L. Chen, H.Y. Wu, Z.Y. Zhang, Y.Y. Yang, *J. Mater. Chem.*, 2011, **21**, 10504.
13. G.X. Gao, H.B. Wu, S.J. Ding, L.M. Liu, X.W. Lou, *Small*, 2015, **11**, 804.
14. Y. Ouyang, R.J. Huang, X.F. Xia, H.T. Ye, X.Y. Jiao, L. Wang, W. Lei, Q.L. Hao, *Chem. Eng. J.*, 2019, **355**, 416.

15. M.J. Pang, S. Jiang, G.H. Long, Y. Ji, W. Han, B. Wang, X.L. Liu, Y.L. Xi, F.Z. Xu, G.D. Wei, *RSC Adv.*, 2016, **6**, 67839.
16. J.W. Xiao, S. H. Yang, *RSC Adv.*, 2011, **1**, 588.
17. Y.Y. Li, F. Tang, R.J. Wang, C. Wang, J.P. Liu, *ACS Appl. Mater. Interfaces*, 2016, **8**, 30232.
18. S. Liu, Z. Wang, S. Zhou, F. Yu, M. Yu, C. Y. Chiang, W. Zhou, J. Zhao, J. Qiu, *Adv. Mater.*, 2017, **29**, 1700874.
19. K. Qu, Y. Zheng, S. Dai, S.Z. Qiao, *Nano Energy*, 2016, **19**, 373.
20. T.W. Zhang, Z.F. Li, Z.X. Zhang, L.K. Wang, P. Sun, S.W. Wang, *J. Phys. Chem. C*, 2018, **122**, 27469.
21. S. Mao, Z. Wen, T. Huang, Y. Hou, J. Chen, *Energy Environ. Sci.*, **2014**, **7**, 609.
22. J. Li, S.Q. Lu, H.L. Huang, D.H. Liu, Z.B. Zhuang, C.L. Zhong, *ACS Sustainable Chem. Eng.*, 2018, **6**, 10021.
23. Y.Y. Liang, Y.G. Li, H.L. Wang, J.G. Zhou, J. Wang, T. Regier, H.J. Dai, *Nat. Mater.*, 2011, **10**, 780.
24. J. Masa, W. Xia, I. Sinev, A.Q. Zhao, Z.Y. Sun, S. Grützke, P. Weide, M. Muhler, W. Schuhmann, *Angew. Chem. Int. Ed.*, 2014, **53**, 8508.
25. A.Q. Zhao, J. Masa, W. Xia, A. Maljusch, M.G. Willinger, G. Clavel, K.P. Xie, R. Schlögl, W. Schuhmann, M. Muhler, *J. Am. Chem. Soc.*, 2014, **136**, 7551.
26. Z.Q. Liu, Q.Z. Xu, J.Y. Wang, N. Li, S.H. Guo, Y.Z. Su, H.J. Wang, J.H. Zhang, S. Chen, *Int. J. Hydrogen Energy*, 2013, **38**, 6657.
27. S.V. Devaguptapu, S. Hwang, S. Karakalos, S. Zhao, S. Gupta, D. Su, H. Xu, G.

Wu, *ACS Appl. Mater. Interfaces*, 2017, **9**, 44567.

28. T.Y. Ma, J.L. Cao, M. Jaroniec, S.Z. Qiao, *Angew. Chem. Int. Ed.*, 2015, **55**, 1138.
